## **Bacterial predator-prey coevolution selects on virulence-associated prey defences**

Ramith R Nair , Marie Vasse, Sébastien Wielgoss, Lei Sun, Yuen-Tsu Nicco Yu, and Gregory J Velicer

The most recent version of this paper has been removed owing to copyright violation.  
Earlier versions of the paper remain available.
